# Supplementary material
Source: Springer Nature journal article supplement (https://www.springermedizin.de/resource/supplementary/12974_2011_404_MOESM3_ESM.pdf/9601586)

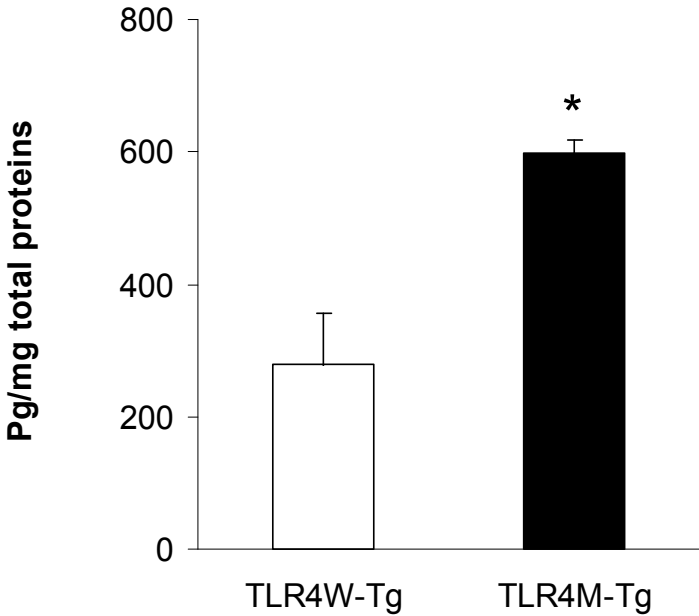

**Soluble Aβ42**

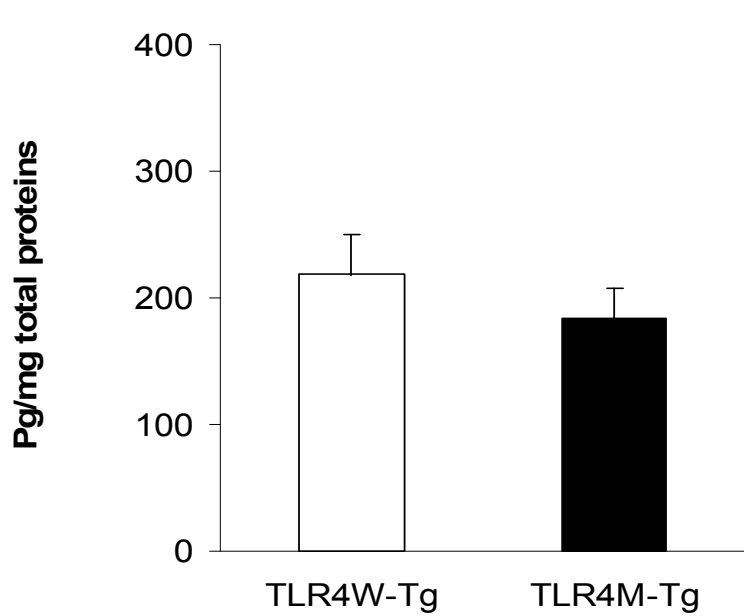

**Soluble Aβ40**

Supplement: MOESM3 [file 9601586]
